# Supplementary material for: N,S co-doped carbon dots as a stable bio-imaging probe for detection of intracellular temperature and tetracycline
Source: Royal Society of Chemistry journal article supplement (doi:10.1039/c7tb00810d), 2017-01-01
Supplement: c7tb00810d1.pdf [file c7tb00810d1.pdf]

## N, S co-doped carbon dots as stable bio-imaging probe for detections of intracellular temperature and antibiotic

### Supporting information

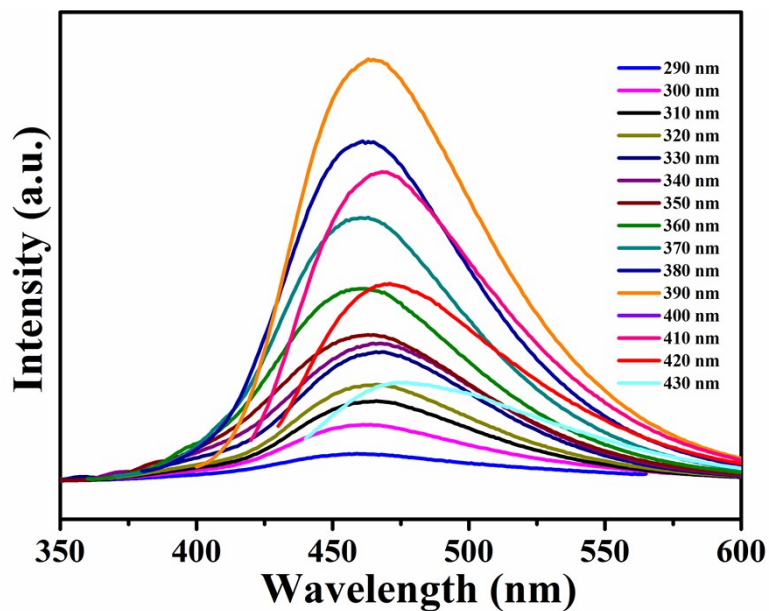

Fig. S1. PL spectra of N, S-CDs with excitation wavelengths from 290 to 430 nm.

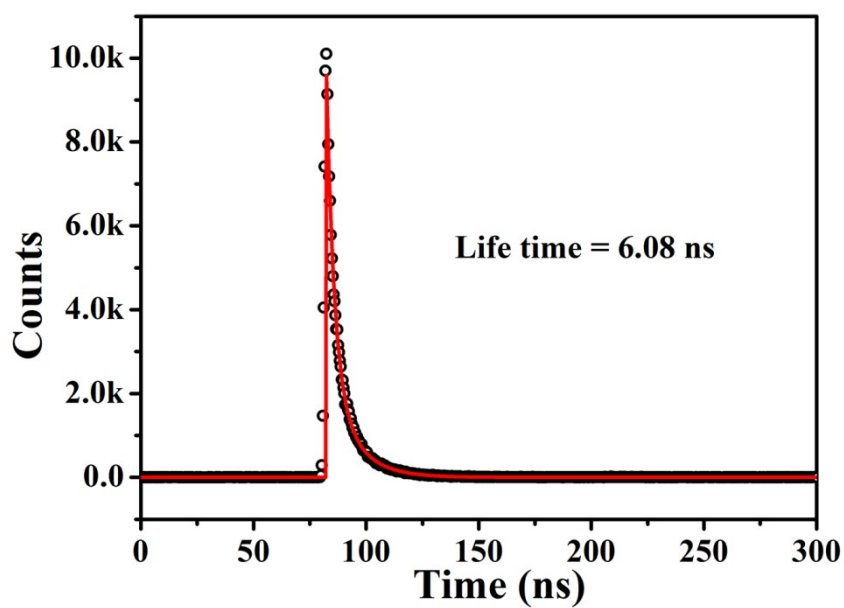

Fig. S2. The luminescence decays of N, S-CDs.

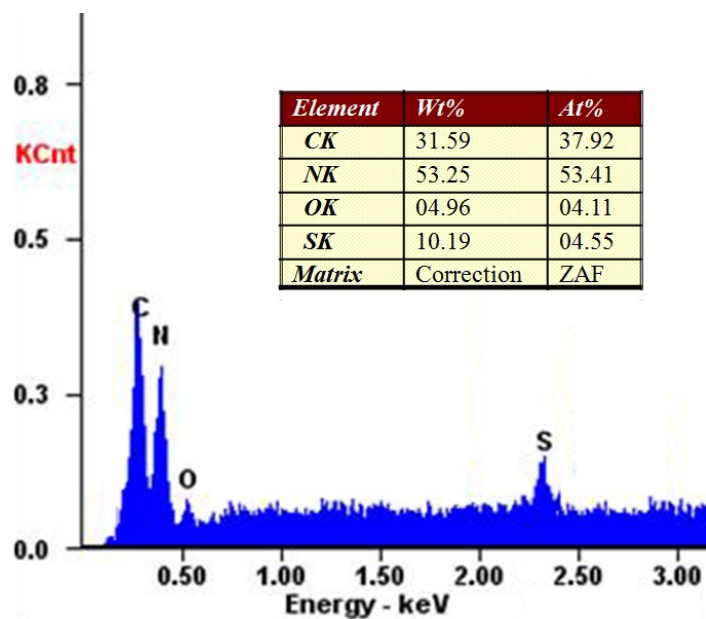

Fig. S3. The EDX spectrum of N, S-CDs.

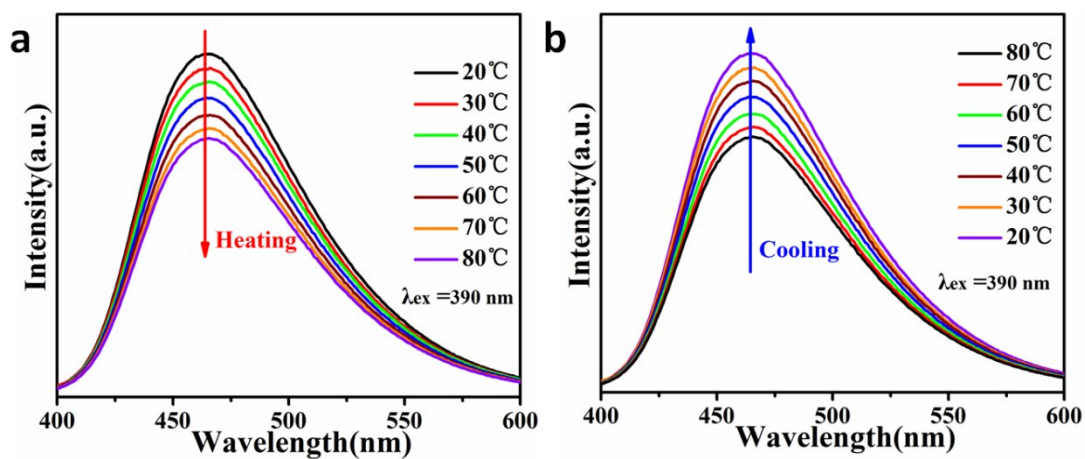

Fig. S4. PL spectra (excitation wavelength 390 nm) of N, S-CDs at various temperatures during two processes: (a) heating and (b) cooling.

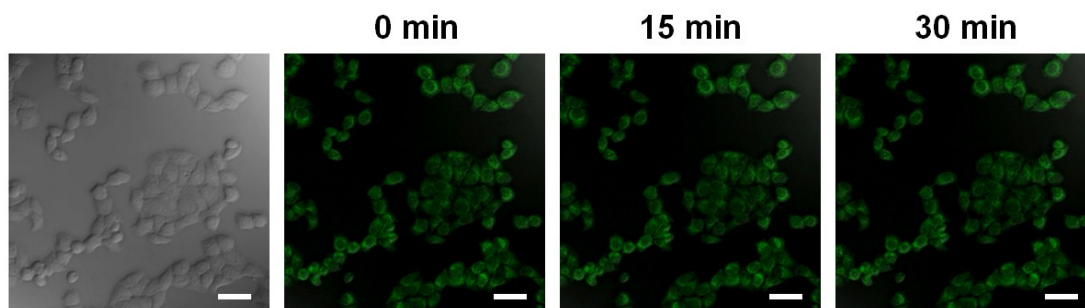

Fig. S5. Confocal fluorescence images of HeLa cells with N, S-CDs under different laser irradiation time (N, S-CDs concentration:  $100 \mu\text{g}\cdot\text{mL}^{-1}$ , incubation time: 24 h). All scale bars represent 25  $\mu\text{m}$ . (Emission was collected at 415-550 nm; excited at 405 nm)

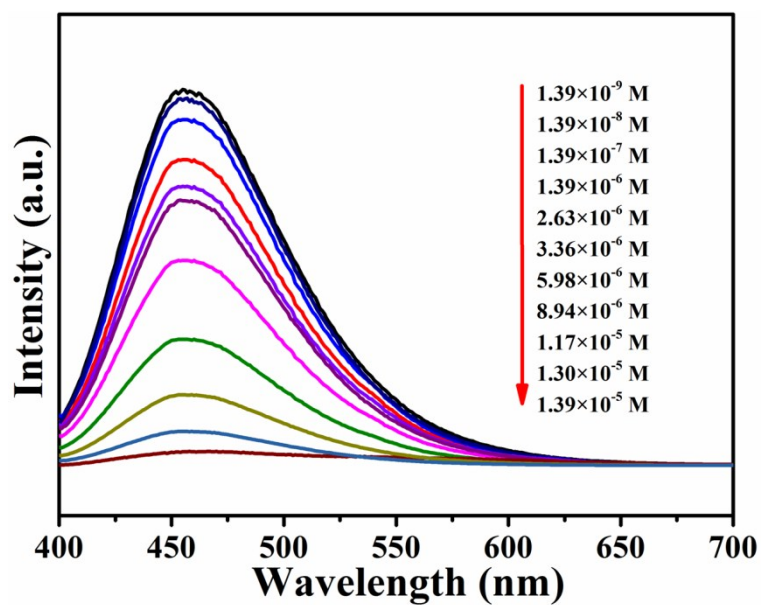

Fig. S6. PL spectra of N, S-CDs with TC detection concentrations from  $1.39 \times 10^{-9}$  to  $1.39 \times 10^{-5}$   $\mu\text{M}$ .

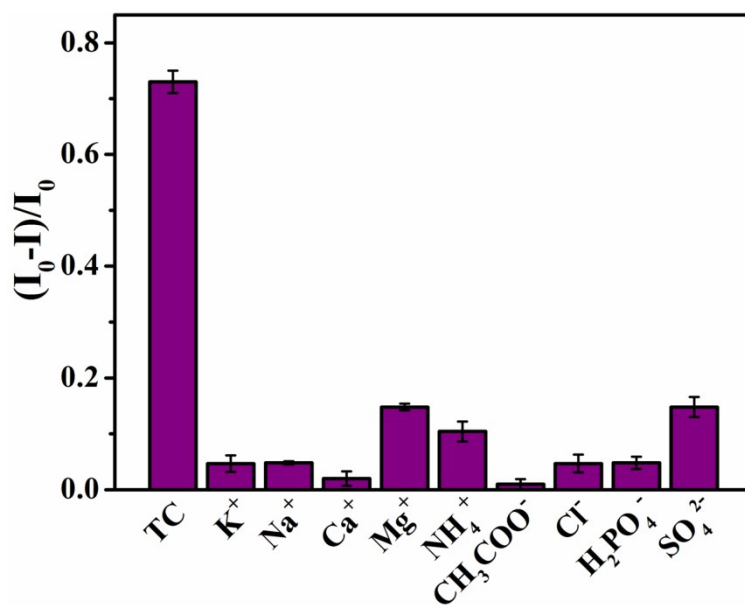

Fig. S7. The fluorescence quenching efficiency in the presence of TC, amino acids and common ions. (The concentration for TC is  $10 \mu\text{M}$ , and for each other guests is  $0.05 \text{ M}$ ).

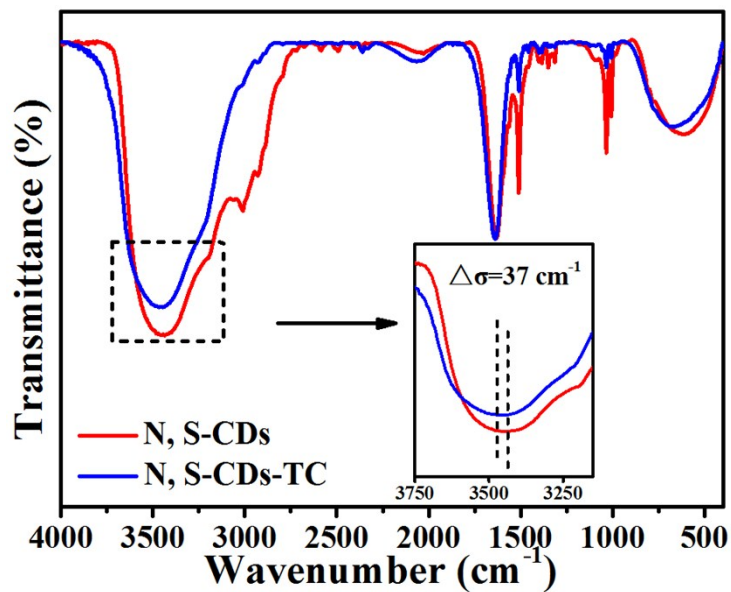

**Fig. S8.** FT-IR spectra of N, S-CDs (red trace) and N, S-CDs-TC system (blue trace). The inset is the enlarged spectral region from 3750  $\text{cm}^{-1}$  to 3150  $\text{cm}^{-1}$ .

**Table S1.** Determination of TC using HPLC and the fluorescence detection method (RE: fluorescence detection vs. HPLC detection.).

| Sample | HPLC<br>( $\mu\text{M}$ ) | Fluorescence detection( $\mu\text{M}$ ) | Relative error (%) |
|--------|---------------------------|-----------------------------------------|--------------------|
|        |                           | N, S-CDs                                | RE                 |
| 1      | 247                       | $240 \pm 7$                             | -2.83              |
| 2      | 195                       | $187 \pm 3$                             | -4.10              |
| 3      | 142                       | $134 \pm 4$                             | -5.63              |
| 4      | 103                       | $92 \pm 3$                              | -10.6              |
| 5      | 57                        | $48 \pm 4$                              | -15.7              |
